# Supplementary material for: The Secretome Deregulations in a Rat Model of Endotoxemic Shock
Source: Hindawi journal article supplement (doi:10.1155/2021/6650464), 2021-01-01
Supplement: f1 [file 6650464.f1.zip]

**A.**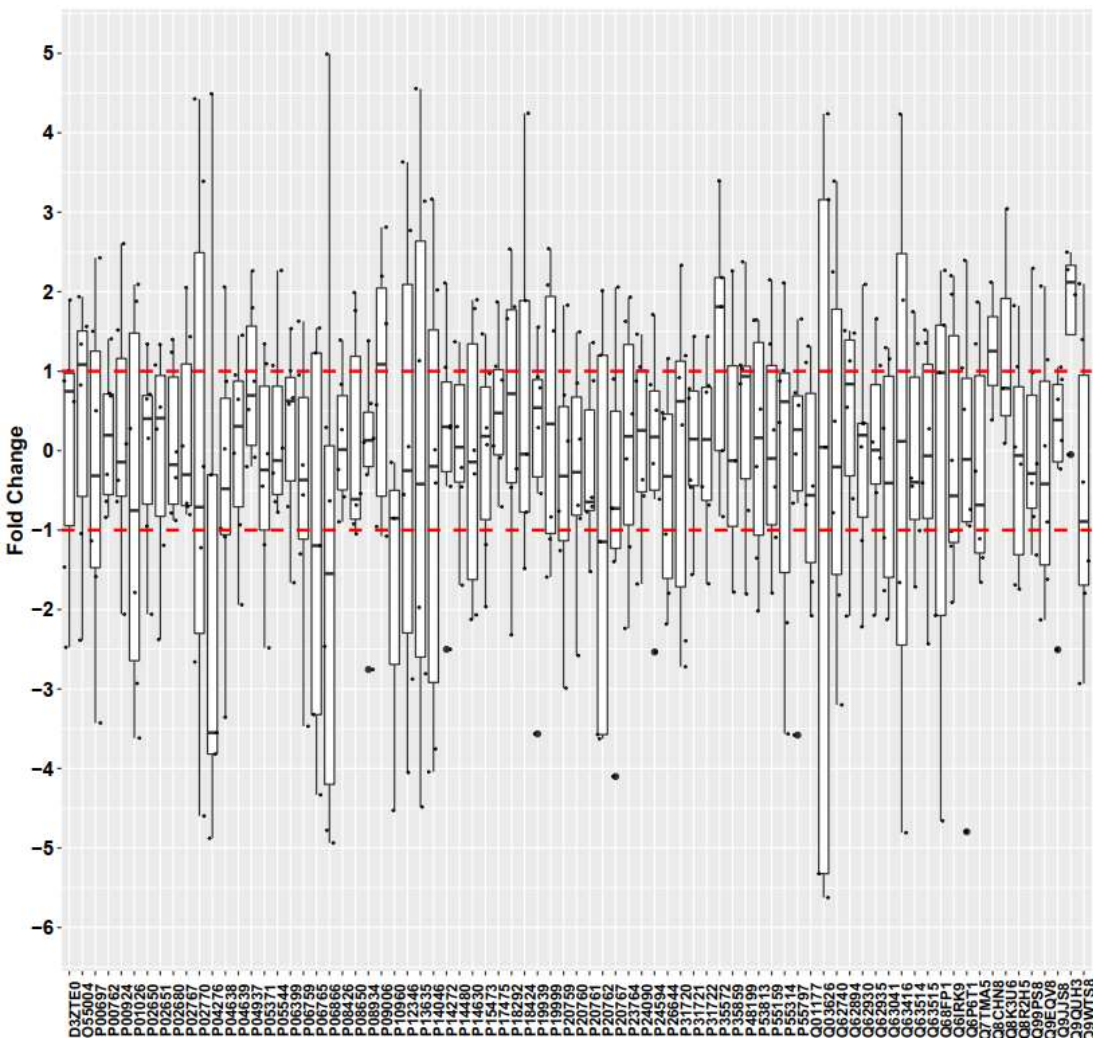**B.**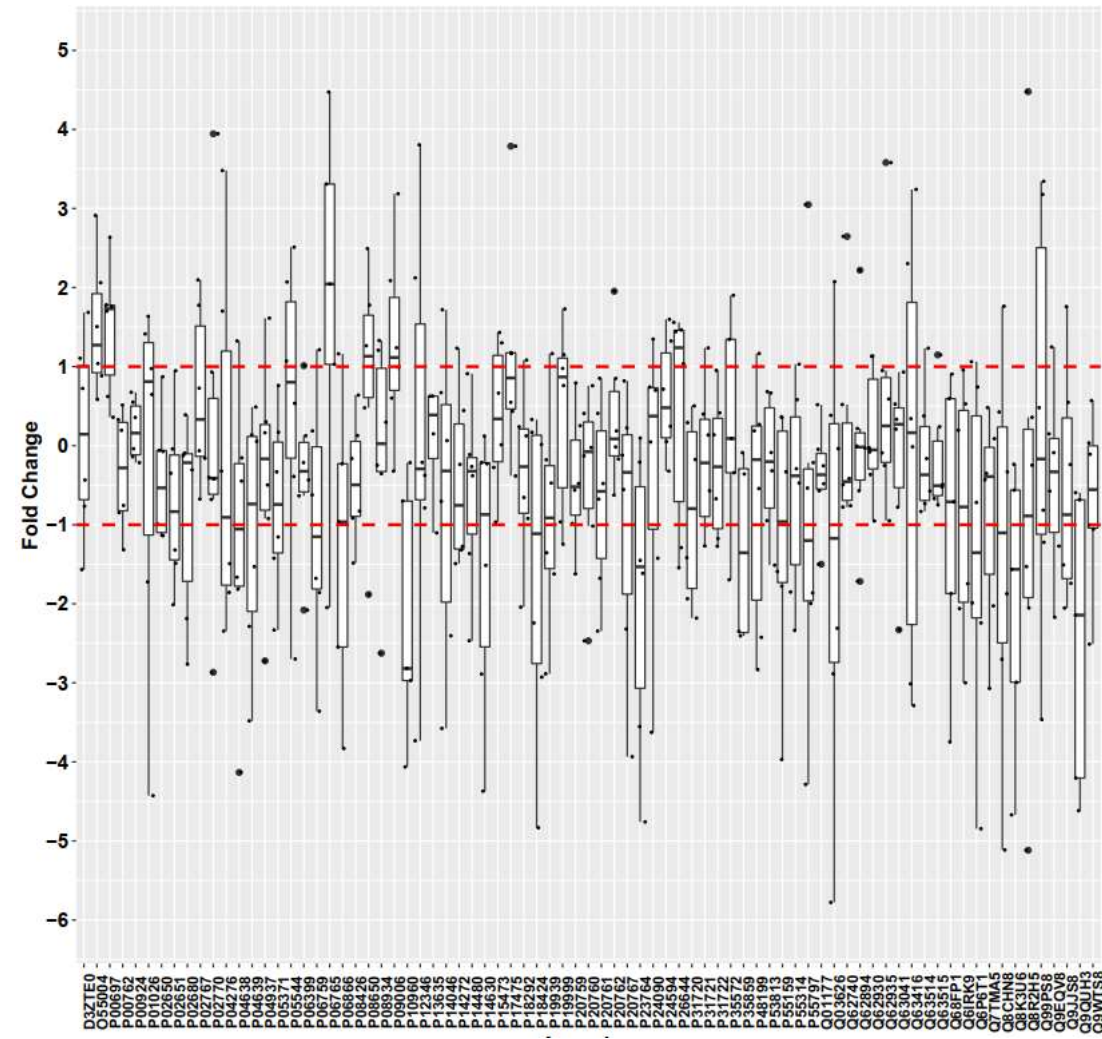

**Supplemental Figure 1: Barplot of plasmatic levels of proteins identified A. Control T50 B. LPS T50**

The analysis of the variation in plasmatic protein levels between T0 and T50 was performed with the Log<sub>2</sub> of the T50/T0 ratio (FC) for each protein in the LPS and control groups. Each point represents the plasma level of the protein for each rat in the group. The red dashed lines represent the thresholds for which proteins are up (Log<sub>2</sub>FC > 1) or downregulated (Log<sub>2</sub>FC < -1).

**A.**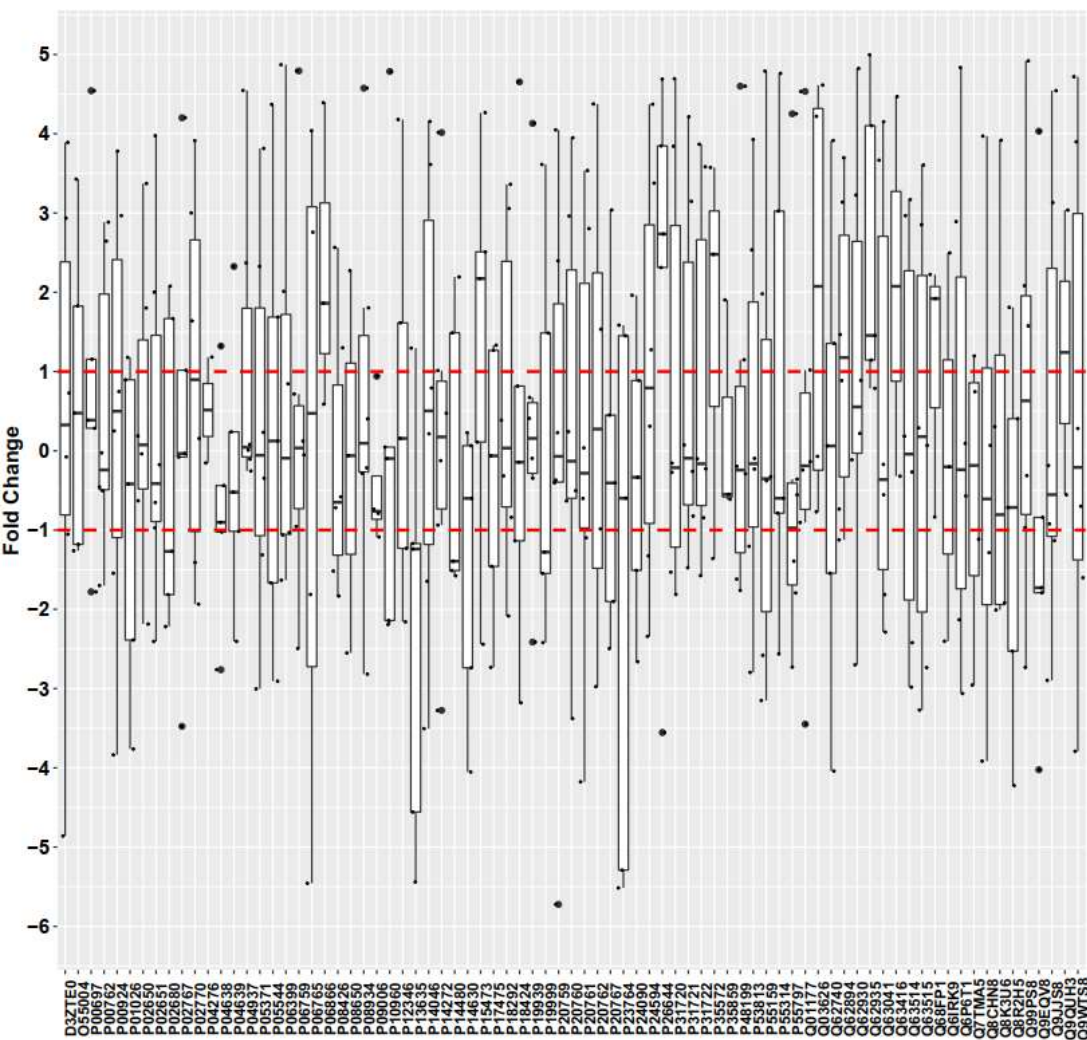**B.**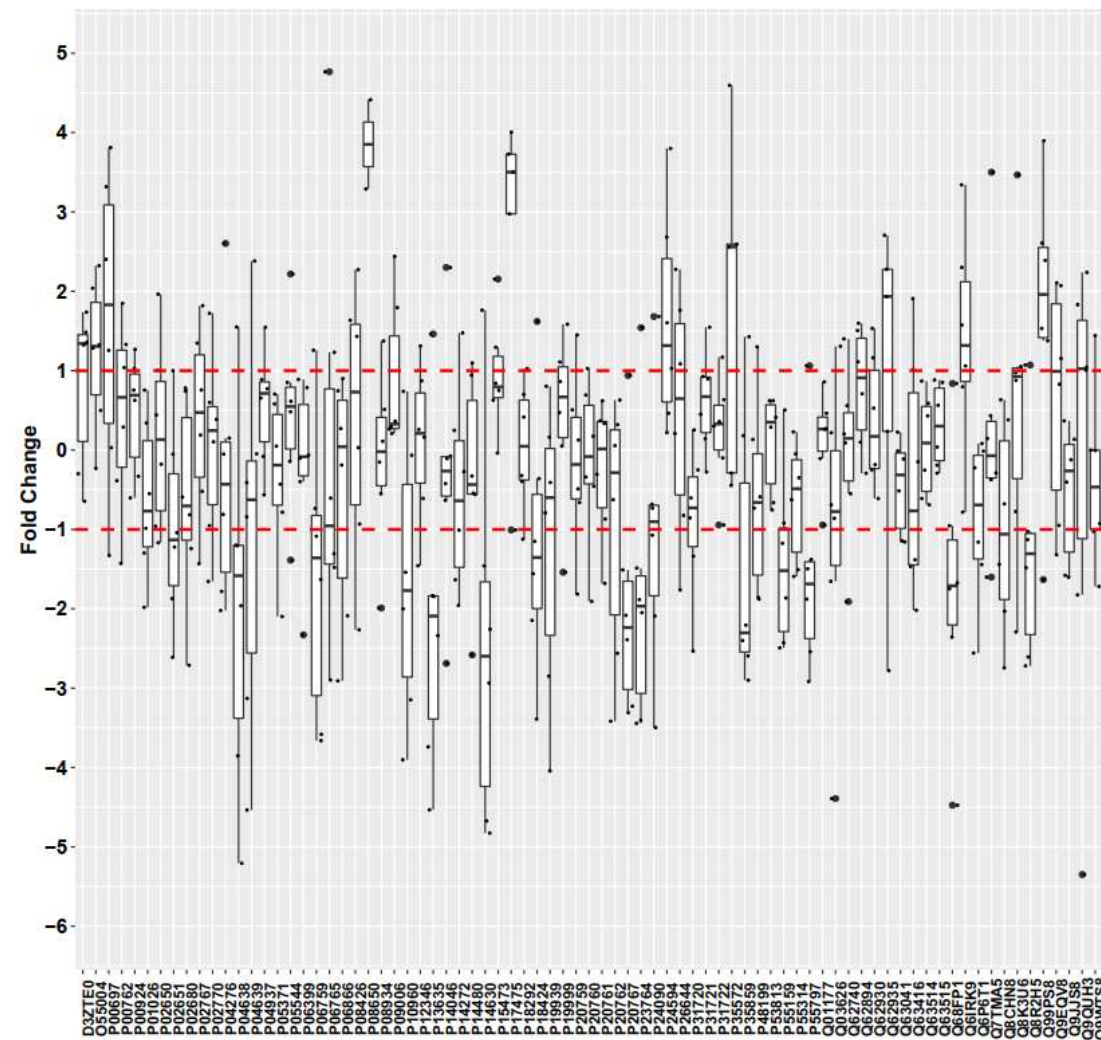

**Supplemental Figure 2: Barplot of proteins identified A. Control T90 B. LPS T90**

The analysis of the variation in plasmatic protein levels between T0 and T50 was performed with the  $\text{Log}_2$  of the T90/T0 ratio (FC) for each protein in the LPS and control groups. Each point represents the plasma level of the protein for each rat in the group. The red dashed lines represent the thresholds for which proteins are up ( $\text{Log}_2\text{FC} > 1$ ) or downregulated ( $\text{Log}_2\text{FC} < -1$ ).

| LPS T50    |                                             |                     |                       |          |                      |                                                                                                                                                                                                                                  |                                                   |
|------------|---------------------------------------------|---------------------|-----------------------|----------|----------------------|----------------------------------------------------------------------------------------------------------------------------------------------------------------------------------------------------------------------------------|---------------------------------------------------|
| #term ID   | term description                            | observed gene count | background gene count | strength | false discovery rate | matching proteins in your network (IDs)                                                                                                                                                                                          | matching proteins in your network (labels)        |
| GO:0005576 | extracellular region                        | 3                   | 1052                  | 1.11     | 0.0352               | 10116.ENSRNOP00000007747,10116.ENSRNOP00000032276,10116.ENSRNOP00000043003                                                                                                                                                       | Lyz2,Pf4,Rnase4                                   |
| GO:0030141 | secretory granule                           | 2                   | 217                   | 1.62     | 0.0352               | 10116.ENSRNOP00000007747,10116.ENSRNOP00000032276                                                                                                                                                                                | Lyz2,Pf4                                          |
|            |                                             |                     |                       |          |                      |                                                                                                                                                                                                                                  |                                                   |
| LPS T90    |                                             |                     |                       |          |                      |                                                                                                                                                                                                                                  |                                                   |
| GO:0005576 | extracellular region                        | 9                   | 1052                  | 1.29     | 5.09e-10             | 10116.ENSRNOP00000007747,10116.ENSRNOP00000008211,10116.ENSRNOP00000012577,10116.ENSRNOP00000023530,10116.ENSRNOP00000024918,10116.ENSRNOP00000025534,10116.ENSRNOP00000043003,10116.ENSRNOP00000049290,10116.ENSRNOP00000061983 | Lyz2,Cpq,Serpina1,Igfbp5,Apoa5,C5,Rnase4,Hrg,F12  |
| GO:0005615 | extracellular space                         | 8                   | 631                   | 1.46     | 5.09e-10             | 10116.ENSRNOP00000007747,10116.ENSRNOP00000008211,10116.ENSRNOP00000012577,10116.ENSRNOP00000023530,10116.ENSRNOP00000024918,10116.ENSRNOP00000025534,10116.ENSRNOP00000049290,10116.ENSRNOP00000061983                          | Lyz2,Cpq,Serpina1,Igfbp5,Apoa5,C5,Hrg,F12         |
| GO:0072562 | blood microparticle                         | 2                   | 17                    | 2.43     | 0.00052              | 10116.ENSRNOP00000024918,10116.ENSRNOP00000049290                                                                                                                                                                                | Apoa5,Hrg                                         |
| GO:0034364 | high-density lipoprotein particle           | 6                   | 14                    | 2.99     | 2.64e-15             | 10116.ENSRNOP00000001126,10116.ENSRNOP00000004662,10116.ENSRNOP00000011823,10116.ENSRNOP00000024196,10116.ENSRNOP00000024832,10116.ENSRNOP00000067045                                                                            | Apom,Apoa2,Pon1,Gpld1,Apoc4,Apoc3                 |
| GO:0005615 | extracellular space                         | 9                   | 631                   | 1.51     | 1.27e-12             | 10116.ENSRNOP00000000696,10116.ENSRNOP00000001126,10116.ENSRNOP00000004662,10116.ENSRNOP00000011823,10116.ENSRNOP00000020233,10116.ENSRNOP00000024196,10116.ENSRNOP00000024832,10116.ENSRNOP00000025857,10116.ENSRNOP00000067045 | Psap,Apom,Apoa2,Pon1,Igfals,Gpld1,Apoc4,Gsn,Apoc3 |
| GO:0034366 | spherical high-density lipoprotein particle | 4                   | 6                     | 3.18     | 4.13e-11             | 10116.ENSRNOP00000001126,10116.ENSRNOP00000004662,10116.ENSRNOP00000011823,10116.ENSRNOP00000067045                                                                                                                              | Apom,Apoa2,Pon1,Apoc3                             |
| GO:0034361 | very-low-density lipoprotein particle       | 4                   | 13                    | 2.85     | 3.50e-10             | 10116.ENSRNOP00000001126,10116.ENSRNOP00000004662,10116.ENSRNOP00000024832,10116.ENSRNOP00000067045                                                                                                                              | Apom,Apoa2,Apoc4,Apoc3                            |
| GO:0032991 | protein-containing complex                  | 8                   | 2124                  | 0.93     | 1.39e-06             | 10116.ENSRNOP00000001126,10116.ENSRNOP00000004662,10116.ENSRNOP00000011823,10116.ENSRNOP00000020233,10116.ENSRNOP00000024196,10116.ENSRNOP00000024832,10116.ENSRNOP00000025857,10116.ENSRNOP00000067045                          | Apom,Apoa2,Pon1,Igfals,Gpld1,Apoc4,Gsn,Apoc3      |
| GO:0042627 | chylomicron                                 | 2                   | 8                     | 2.76     | 4.46e-05             | 10116.ENSRNOP00000004662,10116.ENSRNOP00000067045                                                                                                                                                                                | Apoa2,Apoc3                                       |

**Table Supplemental 1:** Analyses of cellular GO cellular component of common deregulated proteins at 50 and 90 minutes after induction of endotoxemic shock. Analysis using Gene Ontology (GO) databases has made it possible to identify the cellular components (CC) most modified as a result of the injection of LPS.



**A.**

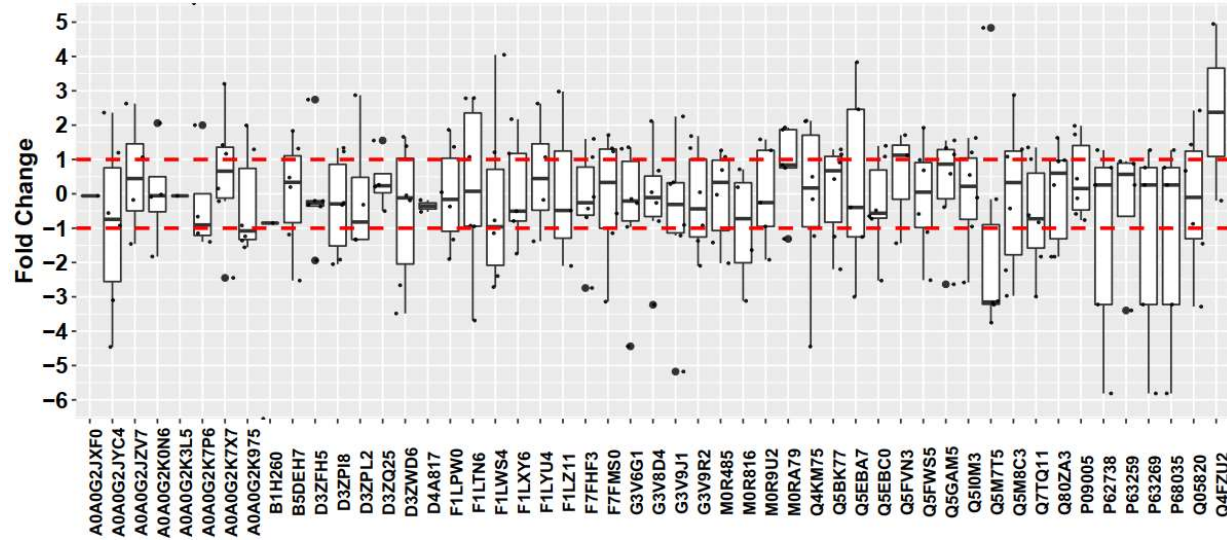

**B.**

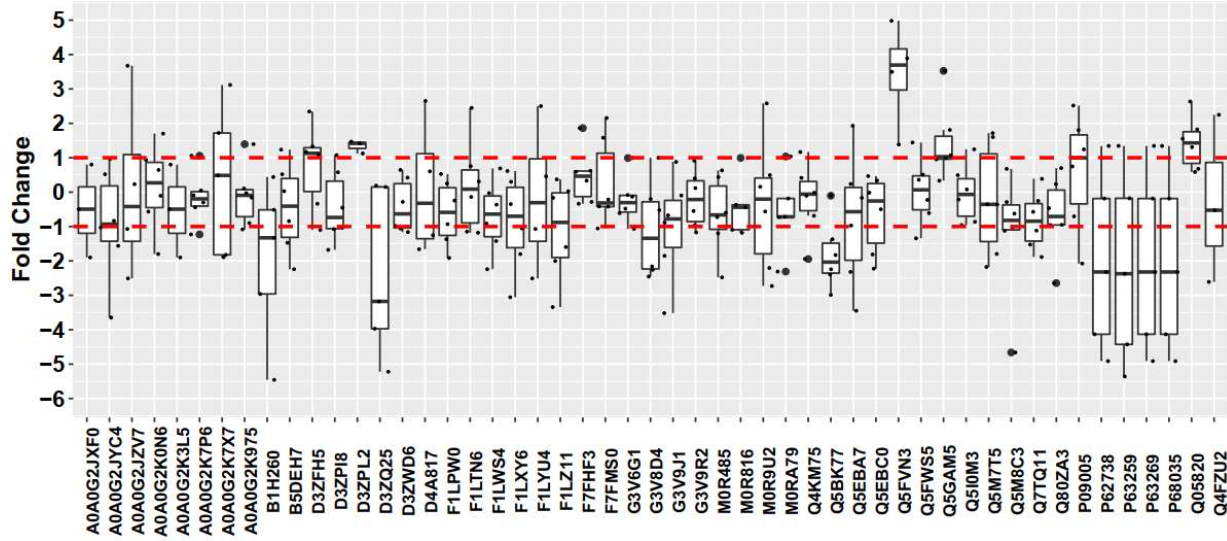

**Supplemental Figure 3: Barplot of proteins specific to T50 group identified **A.** Control T50 **B.** LPS T50**

The analysis of the variation in plasmatic protein levels between T0 and T50 was performed with the Log<sub>2</sub> of the T50/T0 ratio (FC) for each protein in the LPS and control groups. Each point represents the plasma level of the protein for each rat in the group. The red dashed lines represent the thresholds for which proteins are up (Log<sub>2</sub>FC > 1) or downregulated (Log<sub>2</sub>FC < -1).

**A.**

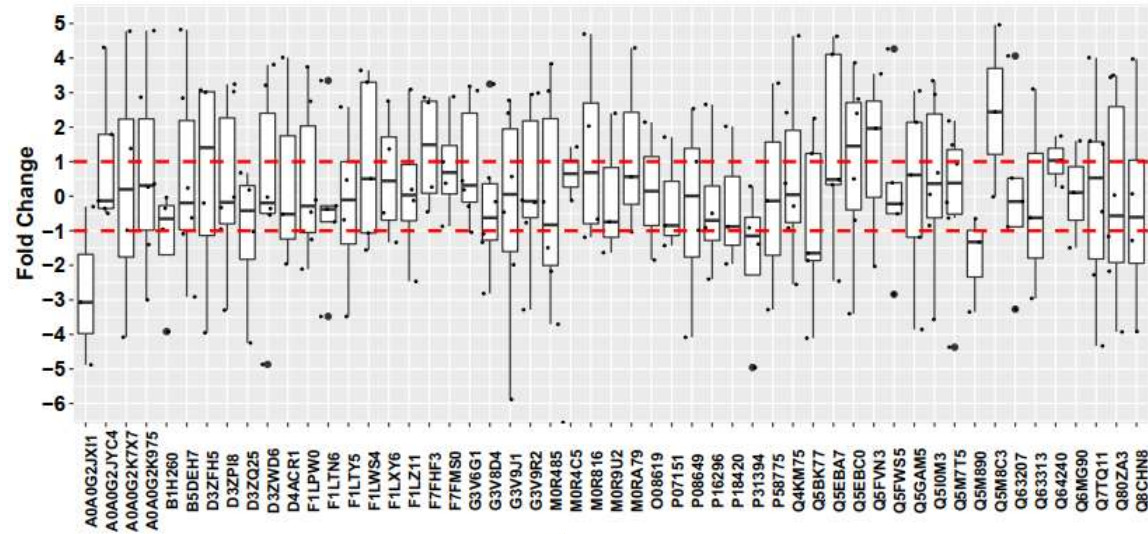

**B.**

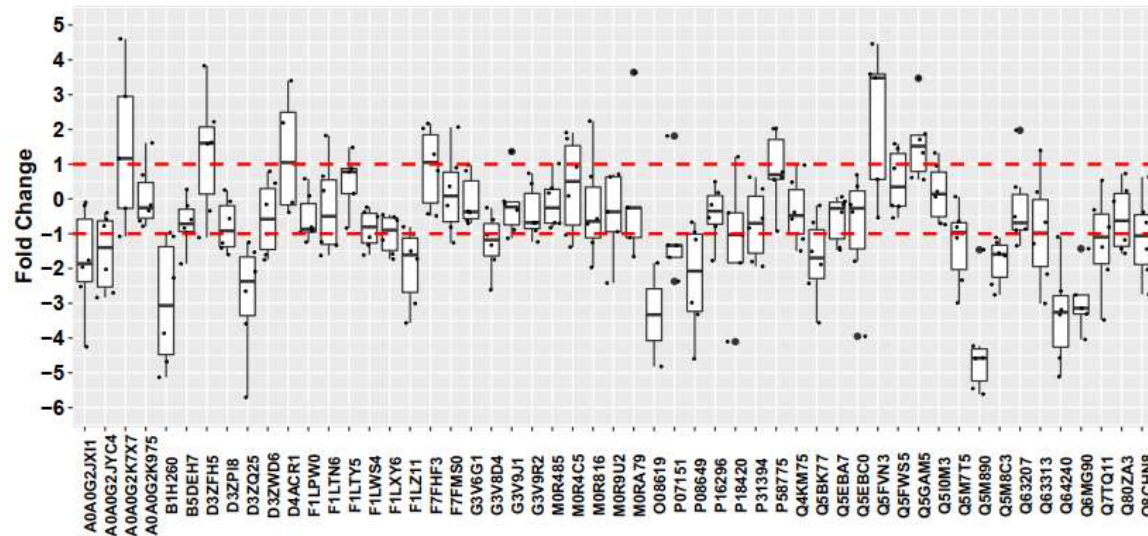

**Supplemental Figure 4:** Barplot of proteins specific to T90 group identified **A.** Control T90 **B.** LPS T90.

The analysis of the variation in plasmatic protein levels between T0 and T50 was performed with the  $\text{Log}_2$  of the T90/T0 ratio (FC) for each protein in the LPS and control groups. Each point represents the plasma level of the protein for each rat in the group. The red dashed lines represent the thresholds for which proteins are up ( $\text{Log}_2\text{FC} > 1$ ) or downregulated ( $\text{Log}_2\text{FC} < -1$ ).
