# Supplementary material for: The Secretome Deregulations in a Rat Model of Endotoxemic Shock
Source: Hindawi journal article supplement (doi:10.1155/2021/6650464), 2021-01-01
Supplement: f1 [file 6650464.f1.zip]

[illegible]

| Accession  | Peptide Unique | Coverage | Area.C90.T0.2 |
|------------|----------------|----------|---------------|
| Q6MG90     | 41             | 80       | 167000        |
| D3ZQ25     | 30             | 38       | 160000        |
| A0A0G2JXI1 | 40             | 23       | 44900         |
| Q8CHN8     | 43             | 53       | 226000        |
| P31394     | 12             | 33       | 28300         |
| B1H260     | 42             | 56       | 169000        |
| P18420     | 15             | 75       | 27800         |
| Q5M890     | 22             | 64       | 508000        |
| Q63313     | 25             | 49       | 51400         |
| P16296     | 11             | 24       | 137000        |
| Q5M8C3     | 23             | 55       | 137000        |
| B5DEH7     | 94             | 82       | 7,00E+06      |
| M0R816     | 8              | 44       | 38100         |
| Q4KM75     | 18             | 47       | 428000        |
| Q5EBA7     | 19             | 26       | 125000        |
| A0A0G2JYC4 | 25             | 58       | 632000        |
| M0RA79     | 5              | 60       | 103000        |
| Q5FWS5     | 33             | 52       | 1030000       |
| Q63207     | 12             | 29       | 121000        |
| Q7TQ11     | 28             | 34       | 2220000       |
| Q5EBC0     | 113            | 84       | 6880000       |
| F1LPW0     | 69             | 63       | 12900000      |
| F1LWS4     | 36             | 62       | 1280000       |
| Q5FVN3     | 13             | 68       | 65900         |
| Q80ZA3     | 55             | 74       | 2700000       |
| F1LTN6     | 22             | 70       | 2220000       |
| P58775     | 4              | 35       | 404000        |
| G3V8D4     | 47             | 90       | 55700000      |
| D3ZPI8     | 15             | 86       | 1320000       |
| D3ZWD6     | 55             | 78       | 2450000       |
| G3V6G1     | 13             | 56       | 791000        |
| D3ZFH5     | 17             | 23       | 84600         |
| Q5GAM5     | 15             | 61       | 868000        |
| M0R485     | 44             | 69       | 4780000       |
| Q5I0M3     | 39             | 89       | 6840000       |
| G3V9R2     | 265            | 93       | 80400000      |
| F7FMS0     | 19             | 29       | 168000        |
| A0A0G2K975 | 75             | 76       | 5780000       |
| F7FHF3     | 12             | 20       | 303000        |
| F1LTY5     | 2              | 28       | 61500         |
| G3V9J1     | 36             | 68       | 4260000       |
| Q5BK77     | 15             | 61       | 762000        |
| Q5M7T5     | 38             | 54       | 1920000       |
| O08619     | 43             | 46       | 1080000       |
| A0A0G2K7X7 | 15             | 20       | 61000         |
| P08649     | 11             | 86       | NA            |
| Q64240     | 20             | 42       | NA            |
| D4ACR1     | 8              | 83       | NA            |
| F1LXY6     | 11             | 100      | NA            |

|        |   |    |    |
|--------|---|----|----|
| F1LZ11 | 6 | 55 | NA |
| P07151 | 8 | 81 | NA |
| M0R9U2 | 4 | 39 | NA |
| M0R4C5 | 4 | 30 | NA |

|    | Area.C90.T0.3 | Area.C90.T0.4 | Area.C90.T0.5 |
|----|---------------|---------------|---------------|
|    | 356000        | 1310000       | 3430000       |
|    | 412000        | 757000        | 1650000       |
|    | 115000        | 47300         | 701000        |
|    | 1220000       | 553000        | 3560000       |
|    | 230000        | 53300         | 329000        |
|    | 422000        | 2250000       | 1600000       |
|    | 96000         | 105000        | 352000        |
|    | 3580000       | 4570000       | 4380000       |
|    | 251000        | 179000        | 415000        |
|    | 898000        | 654000        | 1460000       |
|    | 114000        | 57600         | 725000        |
|    | 10500000      | 9130000       | 32300000      |
| NA |               | 34000         | 208000        |
|    | 770000        | 2110000       | 4800000       |
|    | 86600         | 452000        | 926000        |
|    | 322000        | 1680000       | 983000        |
| NA | NA            |               | 253000        |
|    | 1030000       | 371000        | 2140000       |
|    | 116000        | 121000        | 717000        |
|    | 2630000       | 4950000       | 11700000      |
|    | 6250000       | 7420000       | 18600000      |
|    | 19300000      | 2,50E+07      | 1,04E+08      |
|    | 1340000       | 1340000       | 3390000       |
|    | 27400         | 38400         | 18400         |
|    | 2380000       | 3210000       | 6440000       |
|    | 4670000 NA    |               | 30100000      |
|    | 93300 NA      |               | 512000        |
|    | 1,00E+08      | 1,28E+08      | 1,93E+08      |
|    | 1100000       | 1740000       | 4260000       |
|    | 1030000       | 2590000       | 7420000       |
|    | 393000        | 1250000       | 3920000       |
|    | 31800 NA      |               | 154000        |
|    | 1020000       | 343000        | 1560000       |
|    | 6860000       | 4420000       | 15400000      |
|    | 7840000       | 9450000       | 18200000      |
|    | 85400000      | 97900000      | 2,24E+08      |
|    | 137000        | 91900         | 272000        |
|    | 4330000       | 2030000       | 10400000      |
|    | 156000        | 20500         | 183000        |
| NA | NA            |               | 415000        |
|    | 4110000       | 2690000       | 10100000      |
|    | 457000        | 221000        | 1540000       |
|    | 297000        | 2130000       | 1580000       |
| NA |               | 79300         | 297000        |
| NA |               | 35000 NA      |               |
|    | 48300         | 415000        | 3390000       |
|    | 73300         | 241000        | 298000        |
|    | 25800         | 61100         | 661000        |
|    | 69000         | 363000        | 2750000       |

|       |       |        |        |
|-------|-------|--------|--------|
|       | 27900 | 43300  | 612000 |
|       | 60300 | 207000 | 401000 |
| NA    |       | 42400  | 159000 |
| NA    |       | 88700  | 266000 |
| <hr/> |       |        |        |

| Area.C90.T0.7 | Area.C90.T0.8 | Area.C90.T90.2 |
|---------------|---------------|----------------|
| 21300000      | 23400         | 23700000       |
| 1,20E+07      | 74600         | 16400000       |
| 4480000       | 118000        | 4320000        |
| 14300000 NA   |               | 21400000       |
| 2620000       | 848000        | 2070000        |
| 11500000 NA   |               | 11900000       |
| 1950000 NA    |               | 1930000        |
| 54900000 NA   |               | 2,40E+07       |
| 4810000 NA    |               | 1770000        |
| 6600000       | 137000        | 4650000        |
| 2590000       | 255000        | 4270000        |
| 80600000      | 14600000      | 1,98E+08       |
| 2060000 NA    |               | 987000         |
| 29500000      | 3160000       | 10700000       |
| 3210000       | 245000        | 3090000        |
| 8650000       | 349000        | 12500000       |
| 1520000       | 79500         | 2020000        |
| 14200000      | 11300000      | 19800000       |
| 2970000       | 733000        | 2020000        |
| 48900000      | 13400000      | 35800000       |
| 5,30E+07      | 6610000       | 1,00E+08       |
| 5,04E+08      | 35900000      | 1,73E+08       |
| 19300000      | 1460000       | 1,60E+07       |
| 150000        | 253000        | 768000         |
| 1,80E+07      | 6710000       | 30500000       |
| 1,26E+08      | 12600000      | 22600000       |
| 8,00E+05      | 77400         | 3900000        |
| 7,67E+08      | 70300000      | 5,29E+08       |
| 11200000      | 3880000       | 12500000       |
| 25400000      | 1,20E+07      | 22700000       |
| 20300000      | 4020000       | 7160000        |
| 593000        | 920000        | 712000         |
| 9200000       | 5120000       | 7190000        |
| 33700000      | 23100000      | 39500000       |
| 70900000      | 28600000      | 52800000       |
| 6,94E+08      | 2,73E+08      | 6,20E+08       |
| 832000        | 1310000       | 1240000        |
| 43500000      | 23100000      | 42100000       |
| 3170000       | 1530000       | 2200000        |
| 530000        | 220000        | 369000         |
| 23200000      | 3120000       | 22600000       |
| 4140000       | 3820000       | 3630000        |
| 6320000       | 2790000       | 8710000        |
| 5,00E+06 NA   |               | 4770000        |
| 186000        | 259000        | 159000         |
| 13800000 NA   |               | 22600000       |
| 2230000       | 8470          | 10600000       |
| 278000 NA     |               | 341000         |
| 4490000       | 377000        | 1100000        |

|       |         |        |         |
|-------|---------|--------|---------|
| NA    | 2050000 | 135000 | 966000  |
|       |         | 26100  | 1140000 |
|       | 1430000 | 246000 | 861000  |
|       | 934000  | 206000 | 1290000 |
| <hr/> |         |        |         |

|    | Area.C90.T90.3 | Area.C90.T90.4 | Area.C90.T90.5 |
|----|----------------|----------------|----------------|
|    | 1080000        | 1410000 NA     |                |
|    | 468000         | 1210000        | 86900          |
|    | 13700          | 4040000        | 23800          |
|    | 501000         | 8670000        | 236000         |
|    | 87900          | 2380000        | 175000         |
|    | 411000         | 1160000        | 106000         |
|    | 24700          | 426000 NA      |                |
|    | 2280000        | 448000         | 41800          |
|    | 32300          | 1540000 NA     |                |
|    | 170000         | 4120000        | 779000         |
|    | 618000         | 4550000 NA     |                |
|    | 6810000        | 65400000       | 15200000       |
|    | 30800          | 139000         | 91300          |
|    | 407000         | 11300000       | 6210000        |
|    | 121000         | 7780000        | 169000         |
|    | 252000         | 5810000        | 697000         |
| NA |                | 244000         | 374000         |
|    | 726000         | 13400000       | 2800000        |
|    | 62700          | 4320000        | 1030000        |
|    | 7480000        | 1,50E+07       | 2420000        |
|    | 3,30E+07       | 52200000       | 11500000       |
|    | 17900000       | 1,68E+08       | 43700000       |
|    | 456000         | 13200000       | 1620000        |
| NA |                | 7050000        | 1970000        |
|    | 1060000        | 3,50E+07       | 1430000        |
|    | 3600000 NA     |                | 1,80E+07       |
| NA |                | 540000         | 52600          |
|    | 4,70E+07       | 1,85E+08       | 76700000       |
|    | 1080000        | 14200000       | 2200000        |
|    | 1010000        | 36300000       | 5090000        |
|    | 447000         | 10400000       | 5340000        |
|    | 256000         | 2870000        | 9940           |
|    | 70400          | 22200000       | 6870000        |
|    | 1520000        | 63100000       | 5470000        |
|    | 4350000        | 9,60E+07       | 29100000       |
|    | 50200000       | 7,76E+08       | 1,98E+08       |
|    | 74900          | 4600000        | 542000         |
|    | 1640000        | 56300000       | 12500000       |
|    | 114000         | 7250000        | 1200000        |
|    | 7650           | 726000         | 575000         |
|    | 1040000        | 18400000       | 7340000        |
|    | 26500          | 9060000        | 3630000        |
|    | 831000         | 4080000        | 1020000        |
|    | 169000 NA      | NA             |                |
| NA |                | 961000 NA      |                |
|    | 280000         | 831000         | 2,00E+05       |
|    | 245000         | 494000 NA      |                |
| NA |                | 988000         | 170000         |
|    | 178000         | 2450000        | 1090000        |



|    |       |        |        |
|----|-------|--------|--------|
|    | 31900 | 369000 | 111000 |
|    | 33500 | 678000 | 149000 |
|    | 41400 | 224000 | 51300  |
| NA |       | 239000 | 0      |

---

| Area.C90.T90.7 | Area.C90.T90.8 | Area.L90.T0.2 |
|----------------|----------------|---------------|
| 7560000 NA     |                | 7320000       |
| 5920000 NA     |                | 8230000       |
| 3640000 NA     |                | 3160000       |
| 1,50E+07 NA    |                | 13900000      |
| 3200000        | 27300          | 2550000       |
| 9030000 NA     |                | 7270000       |
| 1060000 NA     |                | 721000        |
| 21900000 NA    |                | 12800000      |
| 3120000 NA     |                | 1210000       |
| 4690000 NA     |                | 1450000       |
| 2560000 NA     |                | 2150000       |
| 95100000       | 1940000        | 75800000      |
| 1300000 NA     |                | 953000        |
| 24200000       | 539000         | 7020000       |
| 4050000 NA     |                | 1680000       |
| 7890000 NA     |                | 2020000       |
| 743000 NA      |                | 335000        |
| 12200000       | 1580000        | 1,40E+07      |
| 2670000        | 76000          | 1160000       |
| 35900000       | 665000         | 43200000      |
| 75100000       | 626000         | 31100000      |
| 3,67E+08       | 8320000        | 1,27E+08      |
| 27400000 NA    |                | 11700000      |
| 585000         | 61900 NA       |               |
| 18400000       | 441000         | 16100000      |
| 1,04E+08       | 1130000        | 26700000      |
| 728000 NA      |                | 2450000       |
| 6,88E+08       | 9980000        | 6,47E+08      |
| 8930000        | 395000         | 5290000       |
| 19800000       | 411000         | 11500000      |
| 16600000       | 1950000        | 6300000       |
| 517000 NA      |                | 533000        |
| 14100000       | 2250000        | 3360000       |
| 30100000       | 1770000        | 30400000      |
| 73500000       | 2410000        | 30100000      |
| 6,41E+08       | 2,80E+07       | 3,20E+08      |
| 1080000 NA     |                | 468000        |
| 55700000       | 2890000        | 20300000      |
| 3810000 NA     |                | 2630000       |
| 330000         | 19700          | 415000        |
| 34400000       | 52900          | 20700000      |
| 1140000        | 1220000        | 1390000       |
| 5590000        | 135000         | 3390000       |
| 1390000        | 91300          | 2640000       |
| 94000          | 15300          | 34500         |
| 6970000 NA     |                | 2480000       |
| 2680000 NA     |                | 1510000       |
| 194000 NA      | NA             |               |
| 3220000 NA     |                | 2140000       |

|       |         |    |    |        |
|-------|---------|----|----|--------|
|       | 1880000 | NA |    | 435000 |
| NA    |         | NA |    | 102000 |
|       | 854000  | NA | NA |        |
|       | 856000  | NA |    | 584000 |
| <hr/> |         |    |    |        |

| Area.L90.T0.3 | Area.L90.T0.5 | Area.L90.T0.6 |
|---------------|---------------|---------------|
| 26500000      | 17100000      | 42300000      |
| 1,60E+07      | 21300000      | 16300000      |
| 6650000       | 12900000      | 3930000       |
| 9280000       | 29600000      | 16400000      |
| 1250000       | 3280000       | 1180000       |
| 8850000       | 2,40E+07      | 12200000      |
| 634000        | 1090000       | 3310000       |
| 86800000      | 1,60E+08      | 6,50E+07      |
| 6090000       | 8960000       | 1660000       |
| 1800000       | 3070000       | 4820000       |
| 7740000       | 28700000      | 4820000       |
| 1,01E+08      | 1,33E+08      | 1,47E+08      |
| 69900         | 883000        | 1030000       |
| 9250000       | 12400000      | 17100000      |
| 2680000       | 10100000      | 5310000       |
| 7560000       | 22600000      | 6,00E+06      |
| 619000        | 1040000       | 1110000       |
| 10200000      | 22100000      | 9850000       |
| 2540000       | 3790000       | 1980000       |
| 21400000      | 53700000      | 33900000      |
| 43500000      | 1,67E+08      | 73600000      |
| 2,35E+08      | 3,16E+08      | 3,18E+08      |
| 14400000      | 30800000      | 9240000       |
| 103000        | 834000        | 202000        |
| 25100000      | 74900000      | 35800000      |
| 29400000      | 69800000      | 1,12E+08      |
| 1050000       | 1540000       | 202000        |
| 3,81E+08      | 1,17E+09      | 8,26E+08      |
| 14500000      | 2,50E+07      | 6620000       |
| 2,20E+07      | 41200000      | 8300000       |
| 9580000       | 1,40E+07      | 9590000       |
| 212000        | 827000        | 739000        |
| 1650000       | 10400000      | 3450000       |
| 27400000      | 91500000      | 60700000      |
| 2,20E+07      | 95600000      | 52900000      |
| 5,03E+08      | 1,14E+09      | 7,62E+08      |
| 1020000       | 4340000       | 653000        |
| 21700000      | 52900000      | 20100000      |
| 1070000       | 3350000       | 1570000       |
| 430000        | 917000        | 545000        |
| 20400000      | 57900000      | 23800000      |
| 4250000       | 7390000       | 3610000       |
| 25600000      | 7760000       | 4900000       |
| 15800000      | 9930000       | 14700000      |
| 125000        | 1180000       | 179000        |
| 7870000       | 3200000       | 23500000      |
| 8240000       | 13300000      | 5180000       |
| 1410000       | 2850000       | 1480000       |
| 7,00E+06      | 7780000       | 1090000       |

|         |         |         |
|---------|---------|---------|
| 1330000 | 3670000 | 565000  |
| 170000  | 1640000 | 2390000 |
| 672000  | 1180000 | 1960000 |
| 749000  | 880000  | 2330000 |

---

| Area.L90.T0.7 | Area.L90.T0.8 | Area.L90.T90.2 |
|---------------|---------------|----------------|
| 2,00E+07      | 5350000       | 740000         |
| 14100000      | 2630000       | 1310000        |
| 8110000       | 903000        | 931000         |
| 17300000      | 4800000       | 3400000        |
| 2360000       | 1030000       | 1430000        |
| 10200000      | 3390000       | 5,00E+05       |
| 1770000 NA    |               | 202000         |
| 15500000      | 30300000      | 540000         |
| 9080000       | 1890000       | 1390000        |
| 4240000       | 1350000       | 999000         |
| 4990000       | 3580000       | 694000         |
| 1,85E+08      | 36200000      | 42400000       |
| 1740000       | 146000        | 4,00E+05       |
| 13100000      | 4030000       | 4720000        |
| 4730000       | 1810000       | 1500000        |
| 11500000      | 3010000       | 497000         |
| 24900         | 15000         | 281000         |
| 17200000      | 3150000       | 25800000       |
| 2980000       | 384000        | 1470000        |
| 65300000      | 14300000      | 10600000       |
| 6,27E+08      | 34100000      | 4,00E+07       |
| 1,70E+08      | 91400000      | 72300000       |
| 9950000       | 7150000       | 3830000        |
| 334000        | 207000        | 1300000        |
| 20100000      | 12200000      | 18900000       |
| 95900000      | 27900000      | 8660000        |
| 3080000       | 2040000       | 1,00E+07       |
| 5,33E+08      | 2,97E+08      | 2,58E+08       |
| 1,40E+07      | 4800000       | 3570000        |
| 30300000      | 6680000       | 10300000       |
| 8070000       | 2590000       | 4920000        |
| 4450000       | 389000        | 1600000        |
| 4610000       | 3330000       | 8430000        |
| 36900000      | 25200000      | 34200000       |
| 73100000      | 21200000      | 3,50E+07       |
| 9,23E+08      | 3,18E+08      | 1,36E+08       |
| 1710000       | 470000        | 1960000        |
| 65600000      | 16300000      | 16100000       |
| 4500000       | 739000        | 6410000        |
| 279000        | 107000        | 712000         |
| 13600000      | 15500000      | 16600000       |
| 4780000       | 1320000       | 869000         |
| 20400000      | 2570000       | 427000         |
| 3650000       | 279000        | 12700          |
| 960000 NA     |               | 839000         |
| 20800000      | 1140000       | 249000         |
| 5490000       | 2630000       | 241000         |
| NA            | 63600         | 155000         |
| 635000        | 1360000       | 1560000        |

|         |           |        |
|---------|-----------|--------|
| 482000  | 426000    | 154000 |
| 8420000 | 324000 NA |        |
| 1330000 | 657000    | 171000 |
| 341000  | 59800     | 224000 |

---

| Area.L90.T90.3 | Area.L90.T90.5 | Area.L90.T90.6 |
|----------------|----------------|----------------|
| 3910000        | 1040000        | 15700000       |
| 5540000        | 1770000        | 6870000        |
| 1160000        | 3320000        | 3670000        |
| 14400000       | 10900000       | 12600000       |
| 1930000        | 2220000        | 308000         |
| 4200000        | 937000         | 6220000        |
| 1470000        | 534000         | 2510000        |
| 4630000        | 3270000        | 23600000       |
| 3820000        | 2,00E+06       | 4370000        |
| 2540000        | 1780000        | 4290000        |
| 3240000        | 4250000        | 1640000        |
| 1,22E+08       | 67600000       | 97400000       |
| 330000         | 593000         | 627000         |
| 18200000       | 9500000        | 7700000        |
| 2550000        | 3660000        | 4080000        |
| 5040000        | 3170000        | 4560000        |
| 287000         | 874000         | 352000         |
| 27800000       | 19400000       | 8490000        |
| 1,00E+06       | 2080000        | 1390000        |
| 3,10E+07       | 20600000       | 27300000       |
| 70300000       | 48300000       | 56900000       |
| 3,52E+08       | 1,62E+08       | 1,68E+08       |
| 12200000       | 12300000       | 7100000        |
| 1240000        | 575000         | 298000         |
| 41600000       | 27900000       | 12100000       |
| 1,04E+08       | 82300000       | 47700000       |
| 1540000        | 811000         | 819000         |
| 3,20E+08       | 3,50E+08       | 4,04E+08       |
| 13800000       | 9410000        | 2750000        |
| 30100000       | 20600000       | 2470000        |
| 16800000       | 10700000       | 5900000        |
| 3010000        | 2550000        | 343000         |
| 18300000       | 15900000       | 5070000        |
| 55400000       | 56400000       | 37800000       |
| 5,50E+07       | 1,00E+08       | 32500000       |
| 8,38E+08       | 7,08E+08       | 4,76E+08       |
| 1310000        | 1810000        | 372000         |
| 66300000       | 46800000       | 1,30E+07       |
| 4370000        | 5880000        | 1120000        |
| 1200000        | 1020000        | 305000         |
| 52500000       | 31300000       | 21500000       |
| 1150000        | 2600000        | 306000         |
| 14600000       | 3570000        | 3140000        |
| 560000         | 26300          | 4110000        |
| 966000         | 979000         | 401000         |
| 4950000        | 405000         | 12100000       |
| 904000         | 385000         | 2430000        |
| 1080000        | 1,30E+07       | 1380000        |
| 4590000        | 2350000        | 761000         |



|         |        |         |
|---------|--------|---------|
| 763000  | 457000 | 282000  |
| 597000  | 655000 | 746000  |
| 1100000 | 913000 | 1020000 |
| 1420000 | 935000 | 1140000 |

---

|    | Area.L90.T90.7 | Area.L90.T90.8 | Log2FC.RC2.T90 |
|----|----------------|----------------|----------------|
|    | 173000         | 607000         | 7,148895146    |
|    | 270000         | 618000         | 6,6794801      |
|    | 426000         | 792000         | 6,588172057    |
|    | 2580000        | 3,00E+06       | 6,565144214    |
|    | 676000         | 1260000        | 6,192684904    |
|    | 292000         | 704000         | 6,137794517    |
|    | 103000         | 179000         | 6,117372154    |
|    | 355000         | 1260000        | 5,562062099    |
|    | 1130000        | 775000         | 5,105837191    |
|    | 1240000        | 1530000        | 5,084982918    |
|    | 908000         | 1660000        | 4,961988272    |
|    | 50800000       | 31600000       | 4,822001698    |
|    | 445000         | 228000         | 4,695187182    |
|    | 4650000        | 5630000        | 4,64385619     |
|    | 1790000        | 1890000        | 4,627606838    |
|    | 1770000        | 1760000        | 4,305859726    |
| NA |                | 187000         | 4,29363905     |
|    | 11800000       | 9460000        | 4,264784188    |
|    | 1600000        | 1510000        | 4,06127634     |
|    | 5860000        | 8160000        | 4,011328006    |
|    | 40600000       | 30400000       | 3,861447625    |
|    | 7,20E+07       | 97400000       | 3,745329067    |
|    | 4640000        | 5020000        | 3,64385619     |
|    | 7340000        | 2310000        | 3,542755941    |
|    | 8880000        | 11600000       | 3,49777793     |
|    | 38100000       | 43800000       | 3,347691191    |
|    | 5280000        | 3130000        | 3,271046926    |
|    | 87100000       | 1,96E+08       | 3,24751849     |
|    | 4610000        | 5730000        | 3,24331826     |
|    | 9960000        | 11600000       | 3,211838643    |
|    | 5220000        | 5100000        | 3,178209988    |
|    | 3510000        | 1810000        | 3,073147673    |
|    | 15100000       | 12200000       | 3,050224823    |
|    | 20800000       | 31300000       | 3,04677013     |
|    | 43900000       | 41100000       | 2,948469699    |
|    | 4,92E+08       | 4,31E+08       | 2,947000809    |
|    | 1500000        | 878000         | 2,883806982    |
|    | 38100000       | 26300000       | 2,864678835    |
|    | 3350000        | 3320000        | 2,860113825    |
| NA |                | 196000         | 2,584962501    |
|    | 6210000        | 14800000       | 2,407397437    |
|    | 890000         | 1160000        | 2,252106645    |
|    | 4050000        | 2690000        | 2,181566408    |
| NA | NA             |                | 2,142957954    |
|    | 455000         | 122000         | 1,382145618    |
|    | 859000         | 507000         | NA             |
|    | 231000         | 262000         | NA             |
| NA |                | 672000         | NA             |
|    | 212000         | 6,00E+05       | NA             |

|         |         |    |
|---------|---------|----|
| 40700   | 129000  | NA |
| 1630000 | 128000  | NA |
| 249000  | 1020000 | NA |
| 1280000 | 199000  | NA |

---

|    | Log2FC.RC3.T90  | Log2FC.RC4.T90 | Log2FC.RC5.T90 |
|----|-----------------|----------------|----------------|
|    | 1,601082166     | 0,106128351 NA |                |
|    | 0,183864192     | 0,676641842    | -4,246966037   |
|    | -3,069386063    | 6,416371299    | -4,880380966   |
|    | -1,283998639    | 3,970680608    | -3,915018476   |
|    | -1,387698791    | 5,48068223     | -0,910732662   |
|    | -0,038104605    | -0,955800196   | -3,915935735   |
|    | -1,958523364    | 2,020464103 NA |                |
|    | -0,650925763    | -3,350623528   | -6,711284117   |
|    | -2,958081294    | 3,104898858 NA |                |
|    | -2,401180699    | 2,655281797    | -0,906273136   |
|    | 2,438573014     | 6,303653923 NA |                |
|    | -0,624662625    | 2,84060387     | -1,087462841   |
| NA |                 | 2,031478231    | -1,187896763   |
|    | -0,919829651    | 2,421007869    | 0,371558863    |
|    | 0,482568117     | 4,105375477    | -2,453988947   |
|    | -0,353636955    | 1,790076931    | -0,49603276    |
| NA | NA              |                | 0,563900885    |
|    | -0,504602884    | 5,174670004    | 0,387816031    |
|    | -0,887587457    | 5,15795236     | 0,522599313    |
|    | 1,507975471     | 1,59946207     | -2,273429577   |
|    | 2,40053793      | 2,814558715    | -0,69366876    |
|    | -0,10864126     | 2,748461233    | -1,250878344   |
|    | -1,555127271    | 3,300233024    | -1,06529146    |
| NA |                 | 7,520373136    | 6,742346053    |
|    | -1,166897309    | 3,44670972     | -2,171045541   |
|    | -0,375425643 NA |                | -0,74176658    |
| NA | NA              |                | -3,283009106   |
|    | -1,089267338    | 0,531381461    | -1,331302365   |
|    | -0,026472211    | 3,028731719    | -0,953349907   |
|    | -0,028289044    | 3,808945545    | -0,543753531   |
|    | 0,185745519     | 3,056583528    | 0,445986088    |
|    | 3,00904514 NA   |                | -3,953540689   |
|    | -3,856849913    | 6,01620729     | 2,13876407     |
|    | -2,174137253    | 3,83552173     | -1,493317613   |
|    | -0,849838253    | 3,344648171    | 0,677080703    |
|    | -0,766548706    | 2,986675887    | -0,177998302   |
|    | -0,871138269    | 5,645425189    | 0,9946862      |
|    | -1,40067121     | 4,79358329     | 0,265344567    |
|    | -0,452512205    | 8,466213275    | 2,713118852    |
| NA | NA              |                | 0,47045062     |
|    | -1,982554866    | 2,774027688    | -0,460503325   |
|    | -4,1081299      | 5,357392776    | 1,237039197    |
|    | 1,484385546     | 0,937715722    | -0,631355406   |
| NA | NA              | NA             |                |
| NA |                 | 4,779109604 NA |                |
|    | 2,535331733     | 1,001737141    | -4,083213368   |
|    | 1,740896646     | 1,035477895 NA |                |
| NA |                 | 4,015266757    | -1,959115525   |
|    | 1,367208974     | 2,754740296    | -1,335103484   |

|    |              |             |              |
|----|--------------|-------------|--------------|
|    | 0,193291302  | 3,091181886 | -2,462971976 |
|    | -0,847996907 | 1,711654506 | -1,428289906 |
| NA |              | 2,401362562 | -1,631996035 |
| NA |              | 1,430004609 | #NOM?        |

---

| Log2FC.RC7.T90  | Log2FC.RC8.T90 | Log2FC.RL2.T90 |
|-----------------|----------------|----------------|
| -1,494395291 NA |                | -3,306246473   |
| -1,019365325 NA |                | -2,651325619   |
| -0,299560282 NA |                | -1,763071486   |
| 0,068947354 NA  |                | -2,031478231   |
| 0,288505093     | -4,957091409   | -0,8344821     |
| -0,348835968 NA |                | -3,861955364   |
| -0,879409859 NA |                | -1,835643966   |
| -1,325875279 NA |                | -4,567040593   |
| -0,624490865 NA |                | 0,200077835    |
| -0,492878102 NA |                | -0,537496317   |
| -0,016808288 NA |                | -1,631329092   |
| 0,238665502     | -2,911839812   | -0,838133584   |
| -0,664132714 NA |                | -1,252476214   |
| -0,285707907    | -2,55156738    | -0,572684171   |
| 0,335348611 NA  |                | -0,163498732   |
| -0,132674833 NA |                | -2,023037536   |
| -1,032637208 NA |                | -0,253590965   |
| -0,219009782    | -2,838326309   | 0,881944238    |
| -0,153623189    | -3,269741875   | 0,34169135     |
| -0,445850621    | -4,33273485    | -2,026967048   |
| 0,502820548     | -3,400415709   | 0,36308542     |
| -0,457643671    | -2,109328411   | -0,812760945   |
| 0,505575046 NA  |                | -1,611092233   |
| 1,963474124     | -2,03112607 NA |                |
| 0,03170886      | -3,927462206   | 0,231325546    |
| -0,276840205    | -3,479029056   | -1,624400812   |
| -0,13606155 NA  |                | 2,029146346    |
| -0,156818013    | -2,816412969   | -1,326394647   |
| -0,326766652    | -3,296132094   | -0,567343648   |
| -0,359328067    | -4,867752202   | -0,158989524   |
| -0,290296486    | -1,043721377   | -0,356693513   |
| -0,197867824 NA |                | 1,585864467    |
| 0,615989396     | -1,186218809   | 1,327071398    |
| -0,162985104    | -3,706071586   | 0,169925001    |
| 0,051958622     | -3,568910095   | 0,217591435    |
| -0,114611306    | -3,285402219   | -1,234465254   |
| 0,376375879 NA  |                | 2,066273219    |
| 0,356661927     | -2,998751454   | -0,334419039   |
| 0,265308157 NA  |                | 1,285261557    |
| -0,683526335    | -3,481235989   | 0,778765905    |
| 0,56828376      | -5,882134497   | -0,318447526   |
| -1,860596943    | -1,64669149    | -0,677656801   |
| -0,177076275    | -4,36923381    | -2,988977298   |
| -1,846843212 NA |                | -7,699565622   |
| -0,984569959    | -4,08134854    | 4,604002544    |
| -0,985437706 NA |                | -3,316122473   |
| 0,265189291 NA  |                | -2,647443498   |
| -0,519028231 NA | NA             |                |
| -0,479654757 NA |                | -0,456064768   |

|    |                 |    |              |
|----|-----------------|----|--------------|
|    | -0,124891248 NA |    | -1,49808505  |
| NA | NA              | NA |              |
|    | -0,743707172 NA | NA |              |
|    | -0,125811753 NA |    | -1,382469637 |

---

| Log2FC.RL3.T90 | Log2FC.RL5.T90 | Log2FC.RL6T90 |
|----------------|----------------|---------------|
| -2,760751847   | -4,039340892   | -1,429893104  |
| -1,530114024   | -3,589032165   | -1,24648996   |
| -2,519229535   | -1,958115919   | -0,098749249  |
| 0,633872101    | -1,441269041   | -0,380272081  |
| 0,626672753    | -0,563136138   | -1,937784604  |
| -1,075288127   | -4,678841548   | -0,971894662  |
| 1,21326141     | -1,029416488   | -0,399143853  |
| -4,228610944   | -5,612637459   | -1,461652859  |
| -0,67286959    | -2,163498732   | 1,396450038   |
| 0,49683159     | -0,786361414   | -0,168055499  |
| -1,256339753   | -2,755515991   | -1,555337332  |
| 0,272525855    | -0,976331094   | -0,593822478  |
| 2,239101664    | -0,574381333   | -0,716106989  |
| 0,97641318     | -0,384340702   | -1,151065974  |
| -0,071735754   | -1,464439739   | -0,380142709  |
| -0,584962501   | -2,833768027   | -0,395928676  |
| -1,108888673   | -0,250878344   | -1,656912343  |
| 1,446515731    | -0,187989717   | -0,214359171  |
| -1,344828497   | -0,86561432    | -0,510415547  |
| 0,534657419    | -1,382277751   | -0,312384322  |
| 0,692509288    | -1,789753009   | -0,371277114  |
| 0,582914672    | -0,963930745   | -0,920565533  |
| -0,239187664   | -1,324272035   | -0,380073827  |
| 3,589623878    | -0,536485428   | 0,560957038   |
| 0,728896164    | -1,424700597   | -1,56495254   |
| 1,822695468    | 0,237665394    | -1,231437561  |
| 0,552541023    | -0,925156531   | 2,019508159   |
| -0,251719093   | -1,741081703   | -1,031786489  |
| -0,071384633   | -1,409661467   | -1,267399598  |
| 0,452259963    | -1             | -1,748600295  |
| 0,810363672    | -0,387816031   | -0,700815861  |
| 3,827627317    | 1,624538013    | -1,107365788  |
| 3,471305719    | 0,612443237    | 0,555389385   |
| 1,015710083    | -0,698076581   | -0,683310282  |
| 1,321928095    | 0,064917477    | -0,702828004  |
| 0,736391844    | -0,687212559   | -0,678829424  |
| 0,36099766     | -1,261705345   | -0,81178037   |
| 1,611313828    | -0,176759193   | -0,628683878  |
| 2,030022483    | 0,811655059    | -0,487265827  |
| 1,480625841    | 0,153575513    | -0,837446987  |
| 1,363748271    | -0,887400691   | -0,146624914  |
| -1,88582898    | -1,507062741   | -3,560395279  |
| -0,810175441   | -1,120132578   | -0,64201719   |
| -4,818353921   | -8,560587108   | -1,838605856  |
| 2,950095094    | -0,269406095   | 1,163642649   |
| -0,668935111   | -2,982078092   | -0,957653709  |
| -3,18824966    | -5,11042399    | -1,091995784  |
| -0,38466385    | 2,189477799    | -0,100928909  |
| -0,608860768   | -1,727109398   | -0,518359776  |



|              |              |              |
|--------------|--------------|--------------|
| -0,801671284 | -3,005513993 | -1,002555705 |
| 1,812196185  | -1,324129003 | -1,679763083 |
| 0,710970386  | -0,370100094 | -0,942284502 |
| 0,922853306  | 0,087462841  | -1,03129613  |

---

|    | Log2FC.RL7.T90  | Log2FC.RL8.T90 |
|----|-----------------|----------------|
|    | -6,853084152    | -3,13977047    |
|    | -5,706591945    | -2,089384056   |
|    | -4,250776579    | -0,189225557   |
|    | -2,745329067    | -0,678071905   |
|    | -1,803691708    | 0,290779396    |
|    | -5,126456973    | -2,267637939   |
|    | -4,103033118 NA |                |
|    | -5,448305381    | -4,587822155   |
|    | -3,006369525    | -1,286118019   |
|    | -1,773724144    | 0,180572246    |
|    | -2,458275613    | -1,108776346   |
|    | -1,864624869    | -0,196065139   |
|    | -1,967210065    | 0,643065455    |
|    | -1,49426419     | 0,482355084    |
|    | -1,401880596    | 0,062396537    |
|    | -2,699812596    | -0,774188058   |
| NA |                 | 3,640003864    |
|    | -0,543621705    | 1,586488355    |
|    | -0,897240426    | 1,975370333    |
|    | -3,478110422    | -0,80937409    |
|    | -3,948913811    | -0,165700416   |
|    | -1,239465935    | 0,091727607    |
|    | -1,10057172     | -0,510255878   |
|    | 4,457860055     | 3,480190179    |
|    | -1,17856392     | -0,072756342   |
|    | -1,331739818    | 0,650665748    |
|    | 0,777607579     | 0,617593505    |
|    | -2,613390909    | -0,599609277   |
|    | -1,602588171    | 0,255500733    |
|    | -1,605100146    | 0,796204798    |
|    | -0,628518867    | 0,977545149    |
|    | -0,342334306    | 2,218147637    |
|    | 1,711709894     | 1,873287065    |
|    | -0,827037288    | 0,312738923    |
|    | -0,735650466    | 0,955074129    |
|    | -0,907672332    | 0,438661104    |
|    | -0,189033824    | 0,901560183    |
|    | -0,783904817    | 0,690190835    |
|    | -0,425763906    | 2,167536972    |
| NA |                 | 0,873242858    |
|    | -1,130941478    | -0,06667104    |
|    | -2,425133377    | -0,186413124   |
|    | -2,332575339    | 0,065837813    |
| NA | NA              |                |
|    | -1,077167861 NA |                |
|    | -4,597781587    | -1,168976172   |
|    | -4,570841392    | -3,327424083   |
| NA |                 | 3,401362562    |
|    | -1,582692327    | -1,180572246   |

|              |              |
|--------------|--------------|
| -3,565932447 | -1,723482365 |
| -2,368948269 | -1,339850003 |
| -2,417208598 | 0,634603877  |
| 1,908300166  | 1,734551041  |

---

| Description                                                                                                      |
|------------------------------------------------------------------------------------------------------------------|
| Complement C4B (Chido blood group) OS=Rattus norvegicus (Rat) OX=10116 GN=C4b PE=1 SV=1                          |
| Fibulin-1 OS=Rattus norvegicus (Rat) OX=10116 GN=Fbln1 PE=1 SV=1                                                 |
| F5/8 type C domain-containing protein OS=Rattus norvegicus (Rat) OX=10116 GN=F5 PE=1 SV=1                        |
| Mannan-binding lectin serine protease 1 OS=Rattus norvegicus (Rat) OX=10116 GN=Masp1 PE=1 SV=2                   |
| Vitamin K-dependent protein C OS=Rattus norvegicus (Rat) OX=10116 GN=Proc PE=2 SV=1                              |
| Coagulation factor XIII B chain OS=Rattus norvegicus (Rat) OX=10116 GN=F13b PE=1 SV=1                            |
| Proteasome subunit alpha type-1 OS=Rattus norvegicus (Rat) OX=10116 GN=Psma1 PE=1 SV=2                           |
| Apolipoprotein N OS=Rattus norvegicus (Rat) OX=10116 GN=Apon PE=1 SV=1                                           |
| Lipopolysaccharide-binding protein OS=Rattus norvegicus (Rat) OX=10116 GN=Lbp PE=2 SV=1                          |
| Coagulation factor IX OS=Rattus norvegicus (Rat) OX=10116 GN=F9 PE=2 SV=2                                        |
| SERPIN domain-containing protein OS=Rattus norvegicus (Rat) OX=10116 GN=Serpina4 PE=1 SV=1                       |
| C1r protein OS=Rattus norvegicus (Rat) OX=10116 GN=C1r PE=1 SV=1                                                 |
| Ig-like domain-containing protein OS=Rattus norvegicus (Rat) OX=10116 GN=ENSRNOG00000055193 PE=1 SV=1            |
| CD5 antigen-like OS=Rattus norvegicus (Rat) OX=10116 GN=Cd5l PE=1 SV=1                                           |
| HGF activator OS=Rattus norvegicus (Rat) OX=10116 GN=Hgfac PE=1 SV=1                                             |
| Complement factor H-related protein B OS=Rattus norvegicus (Rat) OX=10116 GN=LOC100361907 PE=1 SV=1              |
| Ig-like domain-containing protein OS=Rattus norvegicus (Rat) OX=10116 GN=ENSRNOG00000048425 PE=1 SV=1            |
| Lysyl oxidase-like 1 OS=Rattus norvegicus (Rat) OX=10116 GN=Loxl1 PE=2 SV=1                                      |
| Coagulation factor X OS=Rattus norvegicus (Rat) OX=10116 GN=F10 PE=2 SV=1                                        |
| SMB domain-containing protein OS=Rattus norvegicus (Rat) OX=10116 GN=Vtn PE=1 SV=1                               |
| Inter alpha-trypsin inhibitor heavy chain 4 OS=Rattus norvegicus (Rat) OX=10116 GN=Itih4 PE=1 SV=1               |
| Immunoglobulin heavy constant mu OS=Rattus norvegicus (Rat) OX=10116 GN=Ighm PE=1 SV=1                           |
| Uncharacterized protein OS=Rattus norvegicus (Rat) OX=10116 GN=Cfhr2 PE=1 SV=3                                   |
| SCY domain-containing protein OS=Rattus norvegicus (Rat) OX=10116 GN=Ccl9 PE=1 SV=1                              |
| SERPIN domain-containing protein OS=Rattus norvegicus (Rat) OX=10116 GN=Serpinf1 PE=1 SV=1                       |
| Uncharacterized protein OS=Rattus norvegicus (Rat) OX=10116 GN=ENSRNOG00000049829 PE=1 SV=2                      |
| Tropomyosin beta chain OS=Rattus norvegicus (Rat) OX=10116 GN=Tpm2 PE=1 SV=1                                     |
| Apolipoprotein C-II (Predicted) OS=Rattus norvegicus (Rat) OX=10116 GN=Apoc2 PE=1 SV=1                           |
| Lipocln_cytosolic_FA-bd_dom domain-containing protein OS=Rattus norvegicus (Rat) OX=10116 GN=C8g PE=1 SV=1       |
| MACPF domain-containing protein OS=Rattus norvegicus (Rat) OX=10116 GN=C8a PE=1 SV=1                             |
| Immunoglobulin joining chain OS=Rattus norvegicus (Rat) OX=10116 GN=Jchain PE=1 SV=1                             |
| Inter-alpha-trypsin inhibitor heavy chain 2 OS=Rattus norvegicus (Rat) OX=10116 GN=Itih2 PE=1 SV=3               |
| RNAse_Pc domain-containing protein OS=Rattus norvegicus (Rat) OX=10116 GN=Ang2 PE=1 SV=1                         |
| PGRP domain-containing protein OS=Rattus norvegicus (Rat) OX=10116 GN=Pglyrp2 PE=1 SV=2                          |
| Complement component factor h-like 1 OS=Rattus norvegicus (Rat) OX=10116 GN=Cfhr1 PE=1 SV=1                      |
| Complement factor H OS=Rattus norvegicus (Rat) OX=10116 GN=Cfh PE=1 SV=1                                         |
| Macrophage-stimulating 1 OS=Rattus norvegicus (Rat) OX=10116 GN=Mst1 PE=3 SV=1                                   |
| Similar to complement factor H-related protein OS=Rattus norvegicus (Rat) OX=10116 GN=RGD1564614 PE=1 SV=1       |
| SERPIN domain-containing protein OS=Rattus norvegicus (Rat) OX=10116 GN=Serpinf2 PE=1 SV=1                       |
| Ig-like domain-containing protein OS=Rattus norvegicus (Rat) OX=10116 GN=ENSRNOG00000048167 PE=1 SV=1            |
| Uncharacterized protein OS=Rattus norvegicus (Rat) OX=10116 GN=ENSRNOG00000042228 PE=1 SV=3                      |
| Retinoic acid receptor responder (Tazarotene induced) 2 OS=Rattus norvegicus (Rat) OX=10116 GN=Rarres2 PE=1 SV=1 |
| SERPIN domain-containing protein OS=Rattus norvegicus (Rat) OX=10116 GN=Serpinc1 PE=1 SV=1                       |
| Coagulation factor XIII A chain OS=Rattus norvegicus (Rat) OX=10116 GN=F13a1 PE=2 SV=3                           |
| Complement C7 OS=Rattus norvegicus (Rat) OX=10116 GN=C7 PE=1 SV=1                                                |
| Complement C4 OS=Rattus norvegicus (Rat) OX=10116 GN=C4 PE=1 SV=3                                                |
| Protein AMBP OS=Rattus norvegicus (Rat) OX=10116 GN=Ambp PE=1 SV=1                                               |
| Ig-like domain-containing protein OS=Rattus norvegicus (Rat) OX=10116 GN=ENSRNOG00000042996 PE=1 SV=1            |
| Ig-like domain-containing protein OS=Rattus norvegicus (Rat) OX=10116 GN=ENSRNOG00000058824 PE=1 SV=1            |

Ig-like domain-containing protein OS=Rattus norvegicus (Rat) OX=10116 GN=ENSRNOG00000042319 PE=1 SV=  
Beta-2-microglobulin OS=Rattus norvegicus (Rat) OX=10116 GN=B2m PE=1 SV=1  
Ig-like domain-containing protein OS=Rattus norvegicus (Rat) OX=10116 GN=ENSRNOG00000050708 PE=1 SV=  
Ig-like domain-containing protein OS=Rattus norvegicus (Rat) OX=10116 GN=ENSRNOG00000047915 PE=4 SV=

=2

=1

. SV=1

SV=1

=3

E=1 SV=1

=2

=2

=1

=1

=1

[illegible]



| GENERAL INFORMATION |               | PERSONAL INFORMATION |                | EDUCATION     |       | EMPLOYMENT HISTORY |              | FINANCIAL INFORMATION          |                        | CREDIT HISTORY |             | LEGAL INFORMATION |               | MILITARY SERVICE |       | ADDITIONAL INFORMATION |                                |
|---------------------|---------------|----------------------|----------------|---------------|-------|--------------------|--------------|--------------------------------|------------------------|----------------|-------------|-------------------|---------------|------------------|-------|------------------------|--------------------------------|
| NAME                | DATE OF BIRTH | SSN                  | ADDRESS        | CITY          | STATE | ZIP                | PHONE        | EMAIL                          | WEBSITE                | DATE OF BIRTH  | SSN         | ADDRESS           | CITY          | STATE            | ZIP   | PHONE                  | EMAIL                          |
| JOHN DOE            | 1980-01-01    | 123-45-6789          | 123 Main St    | New York      | NY    | 10001              | 212-555-1234 | john.doe@example.com           | john.doe.com           | 1980-01-01     | 123-45-6789 | 123 Main St       | New York      | NY               | 10001 | 212-555-1234           | john.doe@example.com           |
| JANE SMITH          | 1985-03-15    | 987-65-4321          | 456 Elm St     | Los Angeles   | CA    | 90001              | 310-555-5678 | jane.smith@example.com         | jane.smith.com         | 1985-03-15     | 987-65-4321 | 456 Elm St        | Los Angeles   | CA               | 90001 | 310-555-5678           | jane.smith@example.com         |
| ROBERT JONES        | 1975-07-22    | 567-89-1011          | 789 Oak St     | Chicago       | IL    | 60601              | 312-555-9012 | robert.jones@example.com       | robert.jones.com       | 1975-07-22     | 567-89-1011 | 789 Oak St        | Chicago       | IL               | 60601 | 312-555-9012           | robert.jones@example.com       |
| MICHELLE BROWN      | 1990-11-08    | 234-56-7890          | 101 Pine St    | San Francisco | CA    | 94101              | 415-555-3456 | michelle.brown@example.com     | michelle.brown.com     | 1990-11-08     | 234-56-7890 | 101 Pine St       | San Francisco | CA               | 94101 | 415-555-3456           | michelle.brown@example.com     |
| DAVID GARCIA        | 1978-05-12    | 345-67-8901          | 202 Cedar St   | Phoenix       | AZ    | 85001              | 602-555-7890 | david.garcia@example.com       | david.garcia.com       | 1978-05-12     | 345-67-8901 | 202 Cedar St      | Phoenix       | AZ               | 85001 | 602-555-7890           | david.garcia@example.com       |
| SARAH MILLER        | 1982-09-25    | 456-78-9012          | 303 Birch St   | Seattle       | WA    | 98101              | 206-555-2345 | sarah.miller@example.com       | sarah.miller.com       | 1982-09-25     | 456-78-9012 | 303 Birch St      | Seattle       | WA               | 98101 | 206-555-2345           | sarah.miller@example.com       |
| CHRISTOPHER WILSON  | 1970-02-18    | 567-89-0123          | 404 Maple St   | Portland      | OR    | 97201              | 503-555-6789 | christopher.wilson@example.com | christopher.wilson.com | 1970-02-18     | 567-89-0123 | 404 Maple St      | Portland      | OR               | 97201 | 503-555-6789           | christopher.wilson@example.com |
| AMANDA TAYLOR       | 1988-06-03    | 678-90-1234          | 505 Spruce St  | Denver        | CO    | 80201              | 303-555-1011 | amanda.taylor@example.com      | amanda.taylor.com      | 1988-06-03     | 678-90-1234 | 505 Spruce St     | Denver        | CO               | 80201 | 303-555-1011           | amanda.taylor@example.com      |
| ANTHONY HARRIS      | 1973-10-14    | 789-01-2345          | 606 Ash St     | San Diego     | CA    | 92101              | 619-555-4567 | anthony.harris@example.com     | anthony.harris.com     | 1973-10-14     | 789-01-2345 | 606 Ash St        | San Diego     | CA               | 92101 | 619-555-4567           | anthony.harris@example.com     |
| EMILY CLARK         | 1987-04-27    | 890-12-3456          | 707 Hickory St | San Jose      | CA    | 95101              | 408-555-8901 | emily.clark@example.com        | emily.clark.com        | 1987-04-27     | 890-12-3456 | 707 Hickory St    | San Jose      | CA               | 95101 | 408-555-8901           | emily.clark@example.com        |
| MATTHEW ROY         | 1976-08-19    | 901-23-4567          | 808 Walnut St  | San Antonio   | TX    | 78201              | 214-555-2345 | matthew.roy@example.com        | matthew.roy.com        | 1976-08-19     | 901-23-4567 | 808 Walnut St     | San Antonio   | TX               | 78201 | 214-555-2345           | matthew.roy@example.com        |
| STEPHANIE LEE       | 1983-12-05    | 012-34-5678          | 909 Cherry St  | San Jose      | CA    | 95101              | 408-555-6789 | stephanie.lee@example.com      | stephanie.lee.com      | 1983-12-05     | 012-34-5678 | 909 Cherry St     | San Jose      | CA               | 95101 | 408-555-6789           | stephanie.lee@example.com      |
| NICHOLAS WALKER     | 1971-03-28    | 123-45-6789          | 1010 Elm St    | San Jose      | CA    | 95101              | 408-555-1011 | nicholas.walker@example.com    | nicholas.walker.com    | 1971-03-28     | 123-45-6789 | 1010 Elm St       | San Jose      | CA               | 95101 | 408-555-1011           | nicholas.walker@example.com    |
| OLIVIA YOUNG        | 1989-07-11    | 234-56-7890          | 1111 Oak St    | San Jose      | CA    | 95101              | 408-555-2345 | olivia.young@example.com       | olivia.young.com       | 1989-07-11     | 234-56-7890 | 1111 Oak St       | San Jose      | CA               | 95101 | 408-555-2345           | olivia.young@example.com       |
| LEWIS KING          | 1974-11-24    | 345-67-8901          | 1212 Pine St   | San Jose      | CA    | 95101              | 408-555-3456 | lewis.king@example.com         | lewis.king.com         | 1974-11-24     | 345-67-8901 | 1212 Pine St      | San Jose      | CA               | 95101 | 408-555-3456           | lewis.king@example.com         |
| HANNAH SCOTT        | 1986-05-07    | 456-78-9012          | 1313 Cedar St  | San Jose      | CA    | 95101              | 408-555-4567 | hannah.scott@example.com       | hannah.scott.com       | 1986-05-07     | 456-78-9012 | 1313 Cedar St     | San Jose      | CA               | 95101 | 408-555-4567           | hannah.scott@example.com       |
| JUSTIN ADAMS        | 1979-09-16    | 567-89-0123          | 1414 Birch St  | San Jose      | CA    | 95101              | 408-555-5678 | justin.adams@example.com       | justin.adams.com       | 1979-09-16     | 567-89-0123 |                   |               |                  |       |                        |                                |
