# Supplementary material for: The Secretome Deregulations in a Rat Model of Endotoxemic Shock
Source: Oxid Med Cell Longev. 2021 Jul 24;2021:6650464. doi: 10.1155/2021/6650464 (PMC8328724; doi:10.1155/2021/6650464)
Supplement: Supplementary Materials — Supplementary Figure 1 represents the variation in fold change of each protein, common to the T90 and T50 groups, identified in the control and LPS group 50 minutes after shock induction. Supplementary Figure 2 represents the variation of the fold change of each protein, common to the T90 and T50 groups, identified in the control and LPS group 90 minutes after shock induction. Supplementary Figure 3 represents the variation in fold change of each protein, specific to the T50 group, identified in the control and LPS group 50 minutes after shock induction. Supplementary Figure 4 represents the variation in fold change of each protein, specific to the T90 group, identified in the control and LPS group 90 minutes after shock induction. Supplementary Table 1 corresponds to the results of Gene Ontology (GO) analysis which highlighted the most modified cellular components (CC) following the injection of LPS. Supplementary Table 2 includes all quantified proteins and unique peptides as well as measured coverage and calculated Log2foldchange for proteins common to the T50 and T90 groups. Supplementary Table 3 includes all quantified proteins, unique peptides, and the measured coverage and calculated Log2foldchange for T50-specific proteins. Supplementary Table 4 includes all quantified proteins, unique peptides, and the measured coverage and calculated Log2foldchange for T90-specific proteins. [file 6650464.f1.zip]

Archive with 4 entries (4 files):
- Supplemental Figures and table 1 (1).pdf
- Supplemental table 2- Protein shared by T50 and T90 groups (1).pdf
- Supplemental table 3- proteins specific T50 groups (1).pdf
- Supplemental table 4 - Protein specific to T90 groups (1).pdf
